# Supplementary material for: A multi-functional electrolyte additive for fast-charging and flame-retardant lithium-ion batteries
Source: Royal Society of Chemistry journal article supplement (doi:10.1039/d4ta02153c), 2024-01-01
Supplement: d4ta02153c1.pdf [file d4ta02153c1.pdf]

# **A multi-functional electrolyte additive for fast-charging and flame-retardant lithium-ion batteries**

Jing Long,<sup>a</sup> Jiafang Huang,<sup>a</sup> Yuhui Miao,<sup>a</sup> Huiting Huang,<sup>a</sup> Xiaochuan Chen,<sup>\*a</sup> Junxiong Wu,<sup>\*a</sup>  
Xiaoyan Li <sup>\*a</sup> and Yuming Chen <sup>\*a</sup>

<sup>a</sup>Engineering Research Center of Polymer Green Recycling of Ministry of Education, Fujian  
Key Laboratory of Pollution Control & Resource Reuse, College of Environmental and  
Resource Sciences and College of Carbon Neutral Modern Industry, Fujian Normal University,  
Fuzhou, 350117, Fujian, China.

## **1. Experiment section**

## 1.1 Materials

Graphite,  $\text{LiFePO}_4$ (LFP), and carbon black powders were provided by Fujian Judian New Energy Co., Ltd. Lithium discs with a thickness of 450  $\mu\text{m}$  ( $\Phi = 15.8\text{ mm}$ ) were purchased from China Energy Lithium Co., Ltd. ethoxy(pentafluoro)cyclotriphosphazene (PFPN, >98.0%) were purchased from Shanghai Aladdin Co., Ltd. 1,3-dioxolane (DOL, 99.8%), lithium bisfluorosulfonimide salt (LiFSI, 99%), 1 M lithium hexafluorophosphate ( $\text{LiPF}_6$ ) in Dimethyl carbonate (DMC): Ethylene carbonate (EC) (v/v =7:3) were supplied by Duoduo Co., Ltd. The solvents were dehydrated by 4 Å molecular sieves for at least 48 hours and the LiFSI salt was dried at 80 °C overnight inside an Ar-filled glove box (Mikrouna) before use.

## 1.2 Preparation of electrolytes and electrodes:

All the electrolytes were prepared and stored in a glove box filled with high-purity argon (<0.01 ppm for both water and oxygen). The LDP electrolyte was prepared by dissolving 1 M LiFSI in a mixture of DOL and PFPN with a volume ratio of 9:1, while the LD electrolyte was formulated without the addition of PFPN. The carbonate electrolyte, that is, 1 M  $\text{LiPF}_6$  in DMC: EC (v/v =7:3), was used as received. The graphite anodes were obtained by coating the homogeneous slurry containing 80 wt% graphite, 10 wt% carbon black, and 10 wt% CMC in deionized water to a copper foil collector. As for the LFP cathode, a mixed slurry of 80 wt% LFP, 10 wt% carbon black, and 10 wt% PVDF in NMP was coated onto a carbon-coated Al foil collector. The prepared electrodes were dried at 80 °C for 8 h and then subjected to vacuum drying at 60 °C for at least 12 h before use. The mass loading of the graphite electrode for coin cells is about 1.7-1.8  $\text{mg cm}^{-2}$  and the N/P ratio for the assembled CR2025-type full cells was 1.05~1.15. The typical mass loading of LFP in LFP||Li and graphite||LFP coin cells is about 3.4-3.5  $\text{mg cm}^{-2}$ , which is comparable to values reported in the literature.<sup>[S1-S5]</sup> For pouch cells, the mass loading of the LFP electrode is about 6.8-6.9  $\text{mg cm}^{-2}$ . To mitigate the risk of local lithium plating at high rates in pouch cells, a high N/P ratio of 1.40

was used.

### 1.3 Electrochemical measurements:

All CR2025-type coin cells were assembled with Celgard 2500 as the separator. Approximately 80  $\mu\text{L}$  of electrolyte was added to each coin cell to ensure complete wetting of the separator and electrodes. Pouch cells were also assembled for practical evaluation. Galvanostatic charge-discharge and rate tests were performed on Neware battery testers at 25  $^{\circ}\text{C}$ . The ionic conductivity of different electrolytes was measured by EIS from 100 kHz to 0.1 Hz with a 5 mV AC oscillaton. The ionic conductivity was calculated using the equation below

$$\sigma = \frac{L}{RA} \quad (1)$$

where  $\sigma$  is ionic conductivity,  $L$  represents the distance between two electrodes,  $A$  is the area of stainless steel, and  $R$  is the resistance obtained by EIS measurement. The activation energy ( $E_a$ ) was calculated using Arrhenius equation:

$$\sigma = \sigma_0 \exp\left(-\frac{E_a}{RT}\right) \quad (2)$$

where  $\sigma_0$  and  $E_a$  is the pre-exponential factor and the activation energy of ion transportation, respectively. The corrosion of Al foil was studied via chronoamperometry testing under 5.0 V for 72 hours. The Al foil was employed as the working electrode while a Li foil was used as both the counter and reference electrode. The electrochemical window of the electrolyte was studied via linear sweep voltammetry (LSV) at a scanning rate of 2 mV  $\text{s}^{-1}$ .

## **1.4 Characterization:**

To record the morphology of graphite anodes cycled using different electrolytes, all the cells were disassembled in an argon-filled glovebox (Mikrouna) with O<sub>2</sub> and H<sub>2</sub>O levels <0.1 ppm and the electrodes were gently rinsed with pure DME to remove the impurities. The microstructure and morphology of cycled graphite anodes were examined using a scanning electron microscope (SEM, Hitachi 8100) and a transmission electron microscope (TEM, JEM-F200). The solid electrolyte interphases on the cycled graphite electrodes were analyzed by X-ray photoelectron spectroscopy (SCALAB 250 Xi, Thermo Fisher).

## **1.5 Theoretical simulations:**

Density functional theory (DFT) calculation was performed by Gaussian 09 software. [S6, S7] Molecule structures were optimized using the B3LYP functional with the 6-311G++(d,p) basis set. [S8]

## **Supporting Figures**

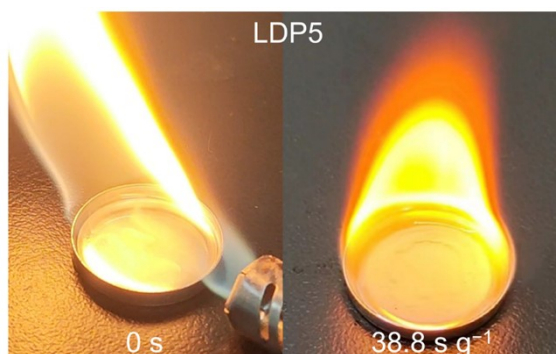

**Figure S1.** Flammability tests of the addition of 5 vol% PFPN (LDP5), the electrolyte was still flammable.

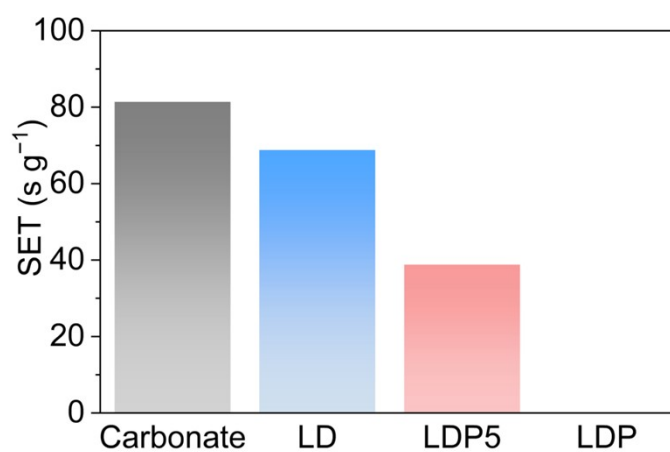

**Figure S2.** The self-extinguishing time (SET) of carbonate and different addition of PFPN.

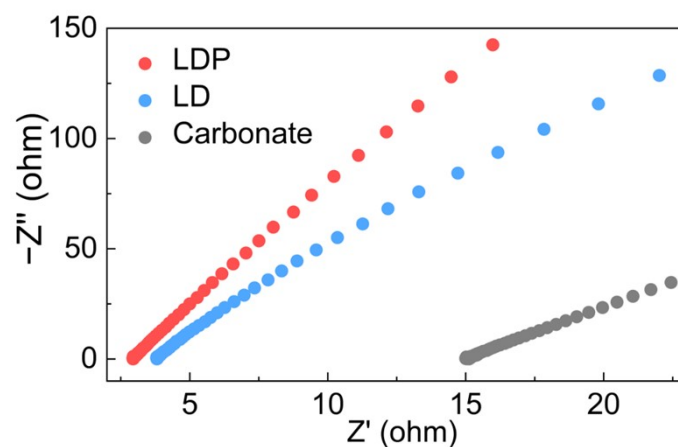

**Figure S3.** Nyquist plots of stainless steel SS||SS symmetric cells using LDP, LD, and carbonate electrolytes.

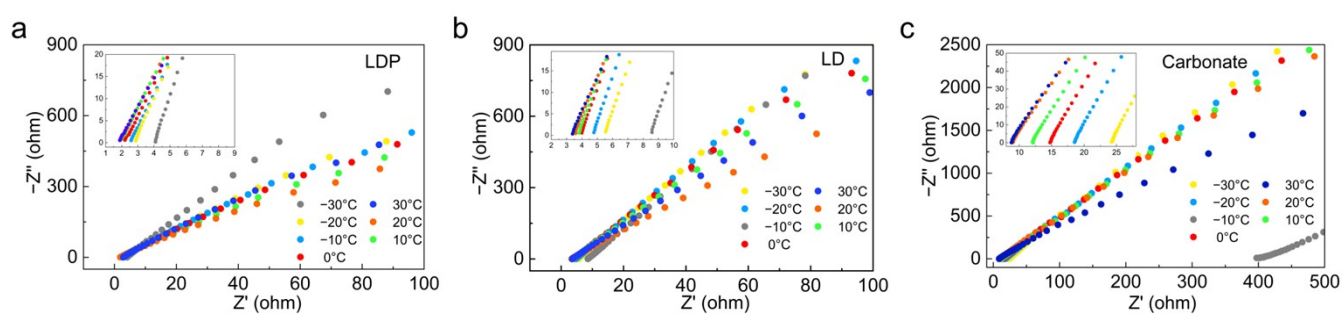

**Figure S4.** Nyquist plots of stainless steel SS||SS symmetric cells using (a)LDP, (b)LD, and (c) carbonate electrolytes at various temperatures ranging from  $-20^{\circ}\text{C}$  to  $30^{\circ}\text{C}$ .

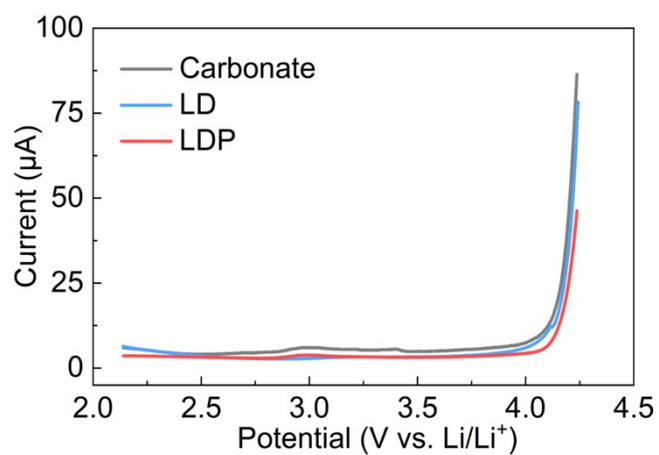

**Figure S5.** The electrochemical window up of three electrolytes. The scan rate was  $1.0 \text{ mV s}^{-1}$ .

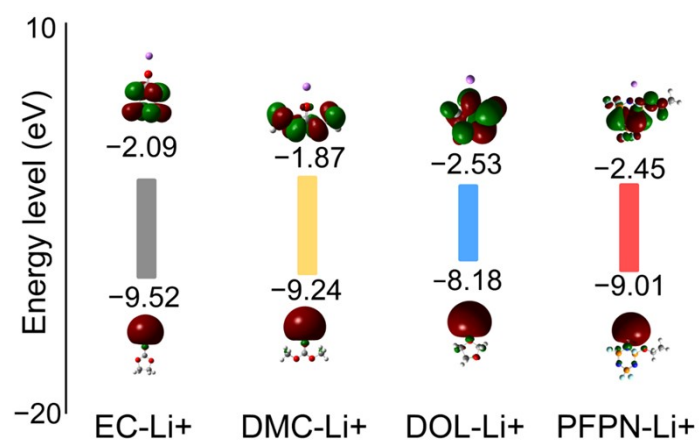

**Figure S6.** HOMO and LUMO energy levels of EC-Li<sup>+</sup>, DMC-Li<sup>+</sup>, DOL-Li<sup>+</sup>, and PFPN-Li<sup>+</sup>.

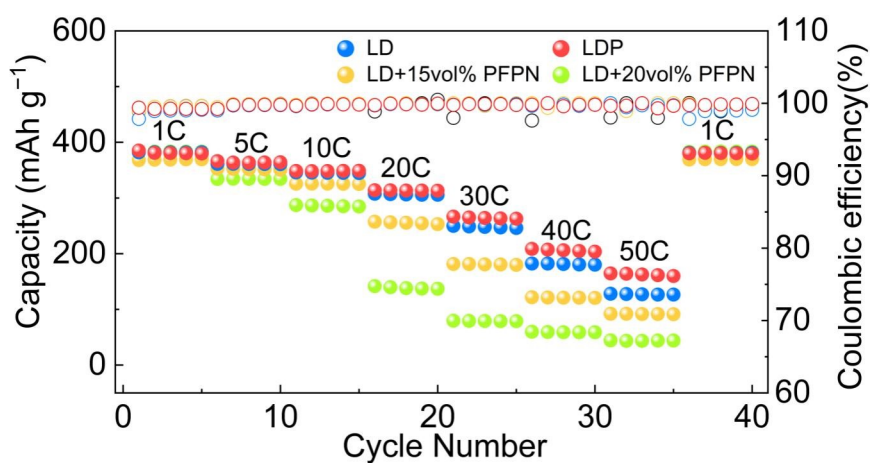

**Figure S7.** Rate performance of Li||graphite cells with various PFPN additions in LDP electrolytes.

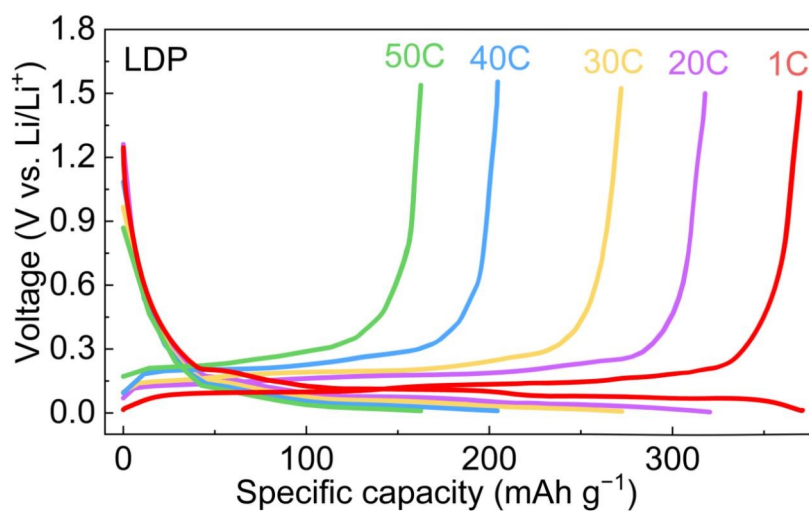

**Figure S8.** The corresponding charge/discharge curves of Li||graphite cells with LDP.

**Table S1** Comparison of the fast-charging battery based on the graphite anode.

| Electrolyte consists | Graphite mass loading | Performance (Li  graphite) | Ref. |
|----------------------|-----------------------|----------------------------|------|
|----------------------|-----------------------|----------------------------|------|



|                                                                              |                                                      |                                                                                                 |              |
|------------------------------------------------------------------------------|------------------------------------------------------|-------------------------------------------------------------------------------------------------|--------------|
| 1 M LiFSI in DOL: PFPN<br>(v/v =9:1) (LDP)                                   | 1.7~1.8 mg cm <sup>-2</sup>                          | ~314.2 mAh g <sup>-1</sup> at 20C after 1000 cycles<br>~164.4 mAh g <sup>-1</sup> at 50C        | This<br>work |
| 1 M LiFSI in DOL                                                             | 1.3~1.8 mg cm <sup>-2</sup>                          | ~350.0 mAh g <sup>-1</sup> at 0.5C after 300 cycles<br>~330.0 mAh g <sup>-1</sup> at 2C         | S9           |
| 1.8 M LiFSI in DOL                                                           | 2.0~2.5 mg cm <sup>-2</sup>                          | ~315.0 mAh g <sup>-1</sup> at 20C<br>~180.0 mAh g <sup>-1</sup> at 50C                          | S10          |
| 1 M LiPF <sub>6</sub> in FEC: AN<br>(v/v =7:3)                               | 1.2 mg cm <sup>-2</sup>                              | ~296.0 mAh g <sup>-1</sup> at 20C<br>~290.0 mAh g <sup>-1</sup> at 20C after 2500 cycles (60°C) | S11          |
| 1 M LiTF in DEGDME                                                           | 5.0 mg cm <sup>-2</sup>                              | ~100 mAh g <sup>-1</sup> at 1A g <sup>-1</sup>                                                  | S12          |
| 1.5 M LiFSI in<br>DME:BTFE (v/v=1:2)                                         | 1.8 mg cm <sup>-2</sup>                              | ~220.0 mAh g <sup>-1</sup> at 4C<br>~188.1 mAh g <sup>-1</sup> at 4C after 200 cycles           | S13          |
| LiFSI: AN: FB= 1: 2.4: 3<br>(by molar ratio)                                 | 2.0~3.0 mg cm <sup>-2</sup>                          | ~302.7 mAh g <sup>-1</sup> at 8C<br>~310.0 mAh g <sup>-1</sup> at 5C after 1000 cycles          | S14          |
| Li <sub>3</sub> P coated graphite                                            | 2.0~2.5 mg cm <sup>-2</sup>                          | 4C charge to 70% SOC (259.0mAh g <sup>-1</sup> ) at -20°C                                       | S15          |
| Applying a MoO <sub>x</sub> -MoN <sub>x</sub><br>layer onto graphite surface | 0.32 mg cm <sup>-2</sup><br>0.54 mg cm <sup>-2</sup> | ~340.4 mAh g <sup>-1</sup> at 6C after 4000 cycles<br>~297.7 mAh g <sup>-1</sup> at 5C          | S16          |

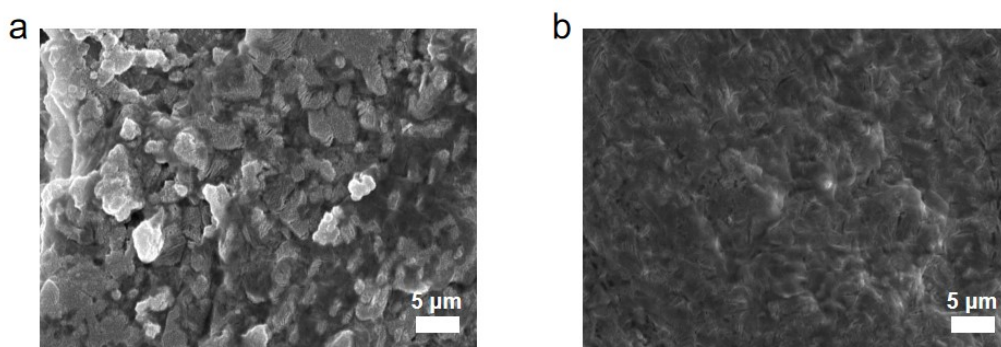

**Figure S9.** SEM images of the graphite anodes: graphite pre-cycled in (a) LD and (b) LDP under fast-charging 20C after 200 cycles.

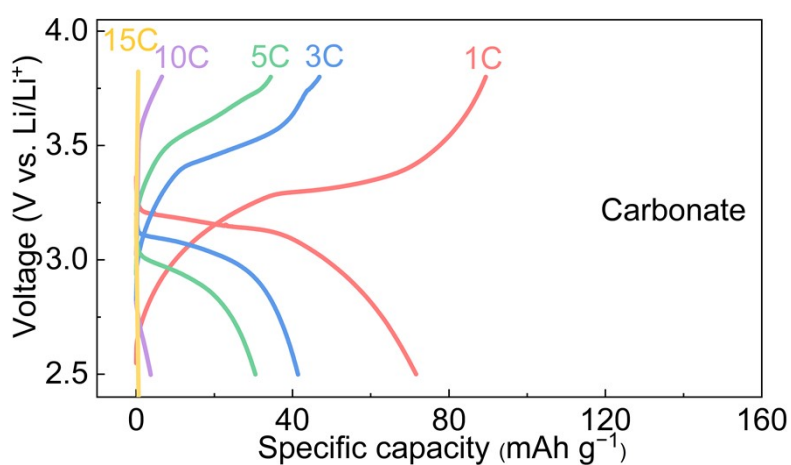

**Figure S10.** The corresponding charge/discharge curves of graphite||LFP cells with carbonate electrolyte.

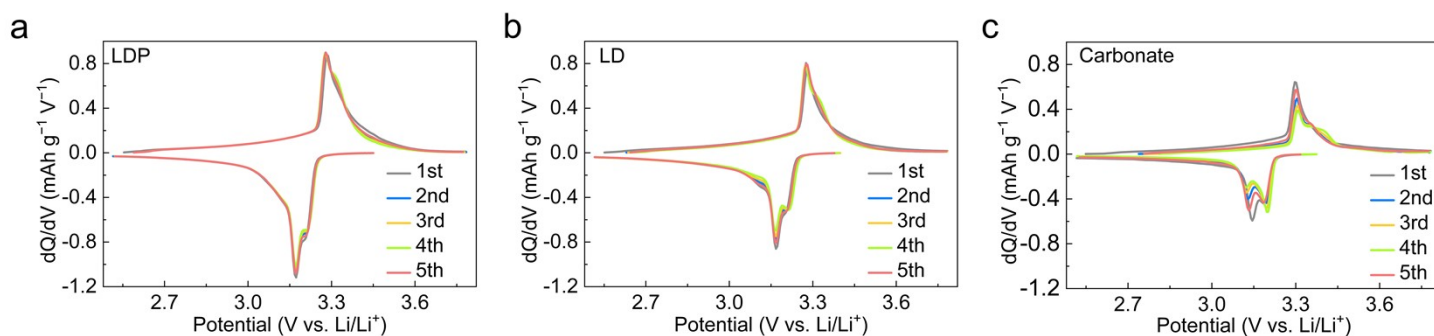

**Figure S11.** The dQ/dV curves of graphite||LFP cells with (a)LDP, (b)LD, and (c)carbonate electrolyte.

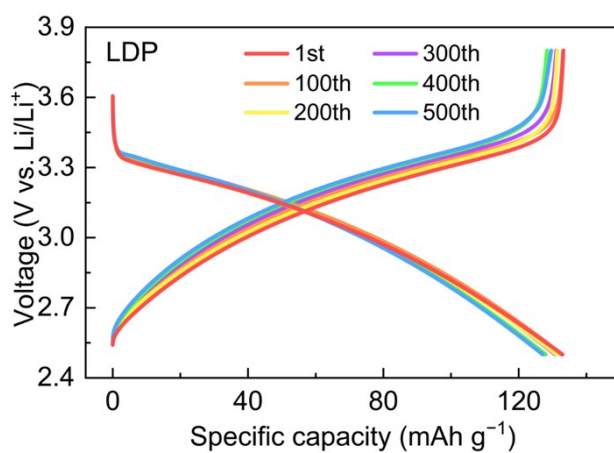

**Figure S12.** The Corresponding charge/discharge curves of graphite||LFP pouch cells with LDP in Fig.6a.

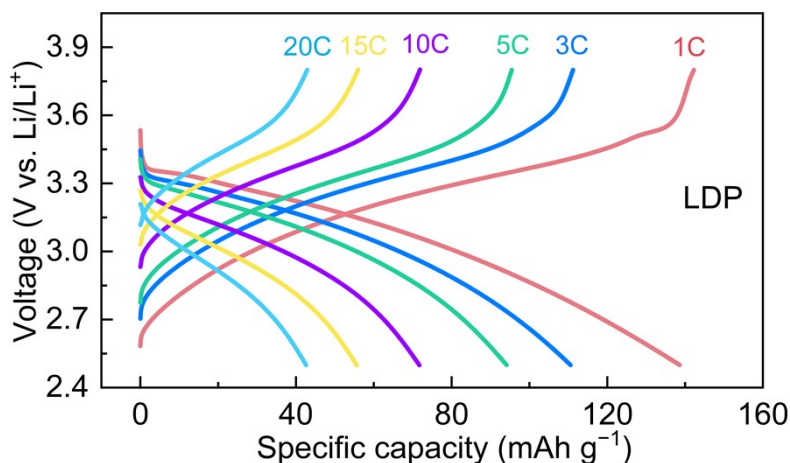

**Figure S13.** The voltage profiles of graphite||LFP pouch cells in LDP at various cycles as indicated in the legend.

## References

- [S1] Z. Li, M. Peng, X. Zhou, K. Shin, S. Tunmee, X. Zhang, C. Xie, H. Saitoh, Y. Zheng, Z. Zhou and Y. Tang, *Adv. Mater.*, 2021, **33**, 2100793.
- [S2] C. Huang, S. Huang, A. Wang, Z. Liu, D. Pei, J. Hong, S. Hou, L. Vitos and H. Jin, *J. Mater. Chem. A*, 2022, **10**, 25500-25508.
- [S3] J. Ge, J. Hong, T. Liu and Y. Wang, *J. Mater. Chem. A*, 2022, **10**, 11458-11469.
- [S4] F. Wang, J. Gao, Y. Liu and F. Ren, *J. Mater. Chem. A*, 2022, **10**, 17395-17405.
- [S5] B. Liu, H. Li, W. Luo, X. Zhang, Z. Liu, P. Yin and R. Zhang, *J. Mater. Chem. A*, 2024, **12**, 10412-10421.
- [S6] G. T. M. Frisch, H. Schlegel, G. Scuseria, M. Robb, J. Cheeseman, G. Scalmani, V. Barone, B. Mennucci, G. Petersson, Gaussian 09, Revision a. 02 Gaussian, Inc., Wallingford, CT 200, 2009.
- [S7] C. Lee, W. Yang and R. G. Parr, *Phys. Rev. B*, 1988, **37**, 785-789.
- [S8] K. Zsolnai-Fehér, P. Wonka and M. Wimmer, *ACM Trans. Graphics*, 2018, **37**, 1-14.
- [S9] D. Xia, E. P. Kamphaus, A. Hu, S. Hwang, L. Tao, S. Sainio, D. Nordlund, Y. Fu, H. Huang, L. Cheng and F. Lin, *ACS Energy Lett.*, 2023, **8**, 1379-1389.
- [S10] C. Sun, X. Ji, S. Weng, R. Li, X. Huang, C. Zhu, X. Xiao, T. Deng, L. Fan, L. Chen, X. Wang, C. Wang and X. Fan, *Adv. Mater.*, 2022, **34**, 2206020.
- [S11] X. Huang, R. Li, C. Sun, H. Zhang, S. Zhang, L. Lv, Y. Huang, L. Fan, L. Chen, M. Noked and X. Fan, *ACS Energy Lett.*, 2022, **7**, 3947-3957.
- [S12] H. Kim, K. Lim, G. Yoon, J. H. Park, K. Ku, H. D. Lim, Y. E. Sung and K. Kang, *Adv. Energy Mater.*, 2017, **7**, 1700418.
- [S13] L. L. Jiang, C. Yan, Y. X. Yao, W. Cai, J. Q. Huang and Q. Zhang, *Angew. Chem., Int. Ed.*, 2020, **60**, 3402-3406.
- [S14] S. Lei, Z. Zeng, M. Liu, H. Zhang, S. Cheng and J. Xie, *Nano Energy*, 2022, **98**, 107265.
- [S15] Y. Huang, C. Wang, H. Lv, Y. Xie, S. Zhou, Y. Ye, E. Zhou, T. Zhu, H. Xie, W. Jiang, X. Wu, X. Kong,

H. Jin and H. Ji, *Adv. Mater.*, 2023, DOI: 10.1002/adma.202308675.

[S16] M. Niu, L. Dong, J. Yue, Y. Li, Y. Dong, S. Cheng, S. Lv, Y.-H. Zhu, Z. Lei, J.-Y. Liang, S. Xin, C. Yang and Y.-G. Guo, *Angew. Chem., Int. Ed.*, 2024, DOI: 10.1002/anie.202318663.
